# Supplementary material for: Regular Humoral and Cellular Immune Responses in Individuals with Chronic Myeloid Leukemia Who Received a Full Vaccination Schedule against COVID-19
Source: MDPI journal article supplement (doi:10.3390/cancers15205066), 2023-10-20

**Supplementary Figure 1. Characterization of TCR $\gamma\delta$ <sup>+</sup> cells from CML individuals and healthy donors before and after receiving the vaccine.** Each dot corresponds to the mean  $\pm$  standard error of the mean (SEM). Each symbol represented a different cohort: healthy donors (open circles), CML On TKI (closed squares), and CML Off TKI (closed triangles). Wilcoxon signed-rank test was applied to calculate the statistical significance within groups. Kruskal-Wallis one-way and Mann-Whitney U of variance by rank were applied to calculate the statistical significance between groups.

**A**

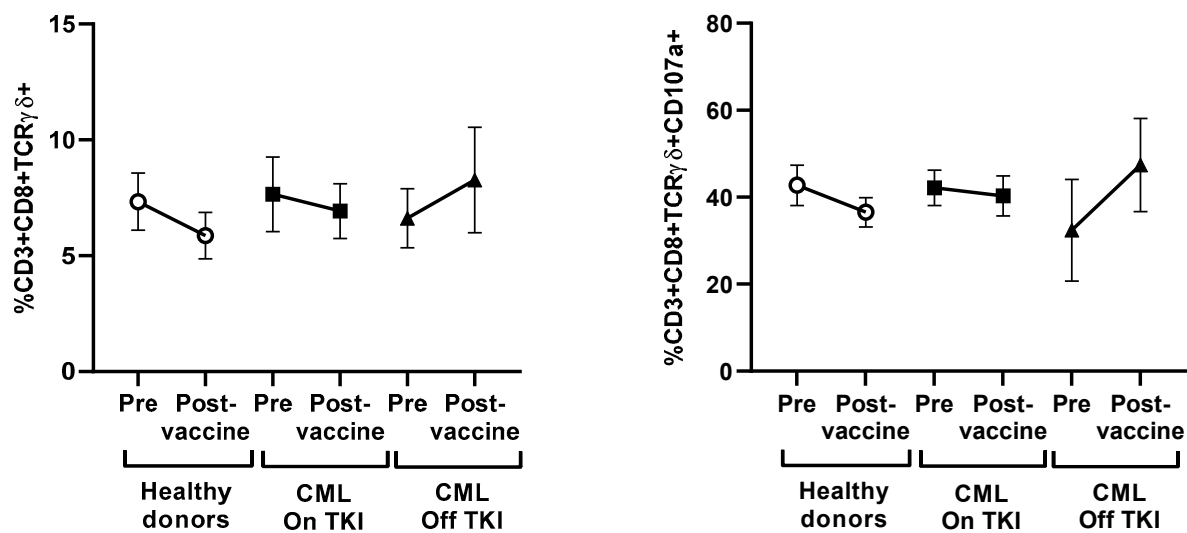

**B**

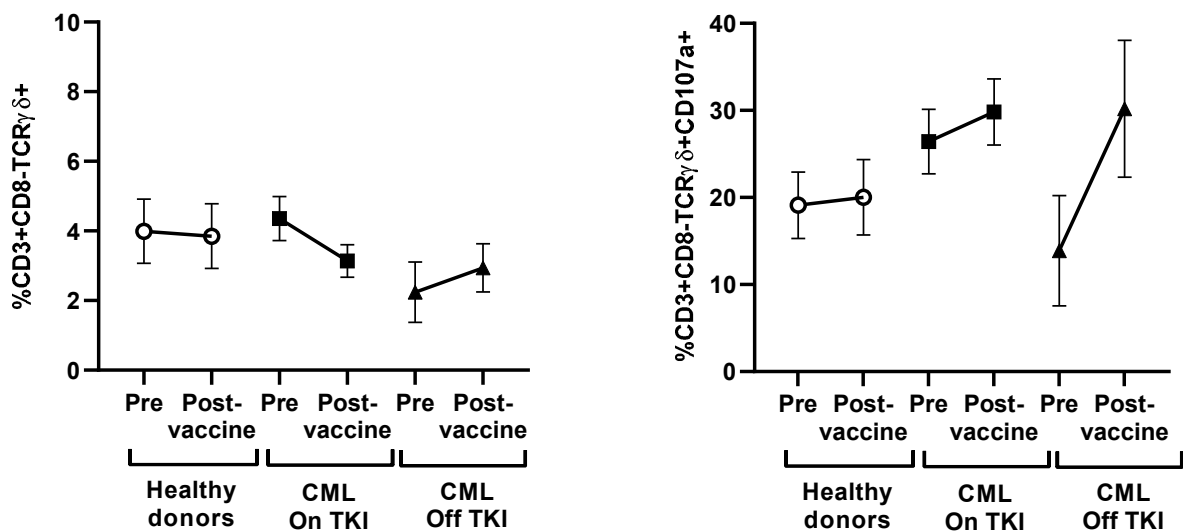

Supplement: s1 [file s1]
